# Supplementary material
Source: PubMed Central journal article supplement (PMC8723353)
Supplement: NIHMS1738698-supplement-Fig_S2.pdf [file NIHMS1738698-supplement-Fig_S2.pdf]

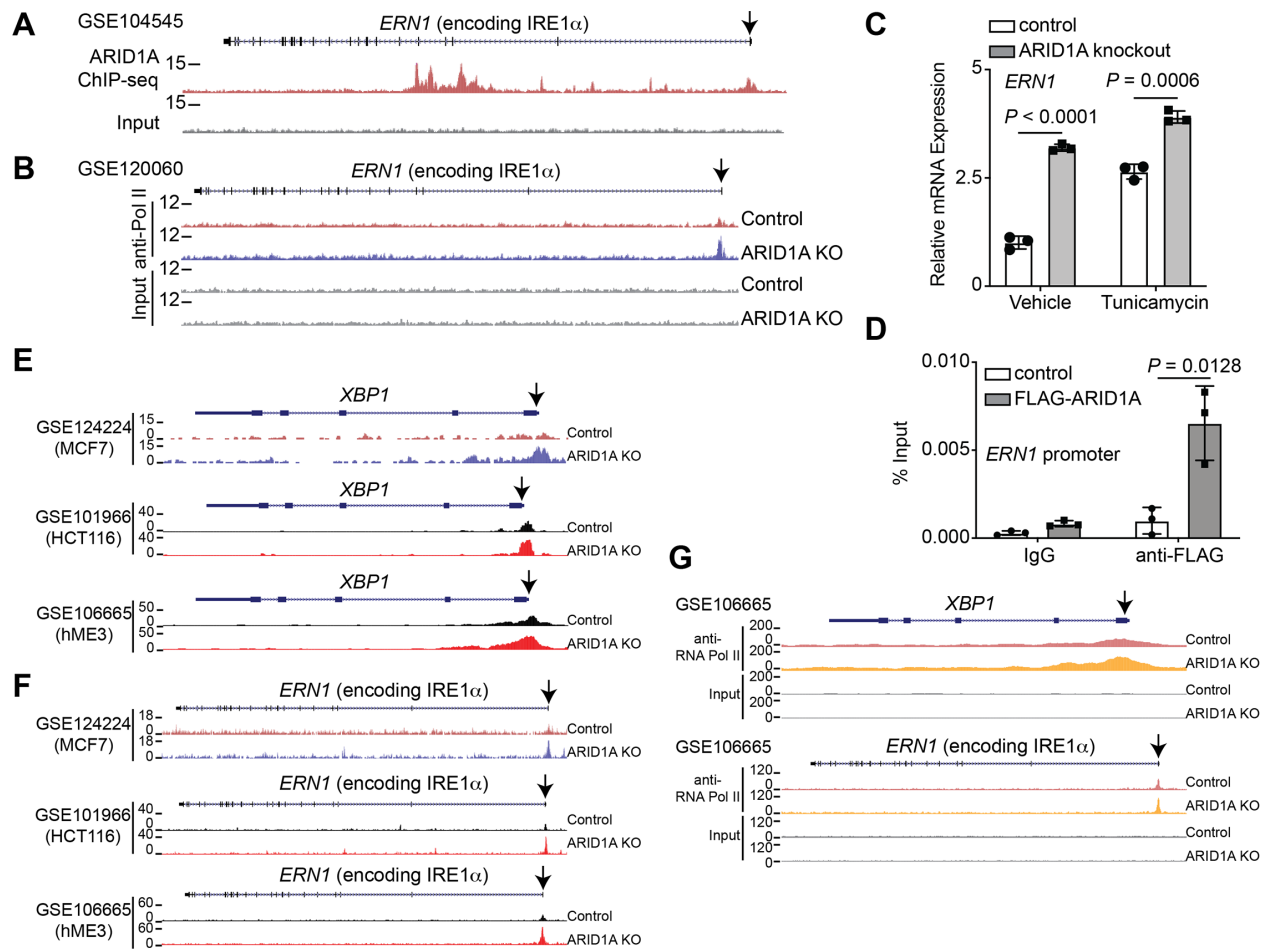

**Supplementary Figure 2: *XBP1* and *ERN1* are direct ARID1A target genes.** (A) ARID1A ChIP-seq and input tracks in the *ERN1* gene locus in ARID1A wildtype RMG1 cells in previously published ChIP-seq datasets. (B) RNA polymerase II ChIP-seq and input tracks in the *ERN1* gene locus in control and ARID1A knockout RMG1 cells in our previously published datasets. (C) Control and ARID1A knockout RMG1 cells were treated with 5  $\mu$ g/mL Tunicamycin or vehicle controls for 4 hours. Expression of *ERN1* was determined by RT-qPCR analysis.  $n = 3$  biologically independent experiments. (D) The association of ARID1A with the *ERN1* gene promoter in control parental and FLAG-tagged endogenous ARID1A-expressing RMG1 cells was determined by ChIP-qPCR analysis. An isotype matched IgG was used as a negative control.  $n = 3$  biologically independent experiments. (E-F) ATAC-seq tracks in the *XBP1* gene locus (E) or the *ERN1* gene locus (F) based on mining the indicated public databases. (G) RNA polymerase II ChIP-seq and input tracks in the *XBP1* and *ERN1* gene loci based on mining the indicated public databases.  $P$  values were calculated using two-tailed Student's  $t$ -test. Error bars represent mean with SD.
