# Supplementary material
Source: PubMed Central journal article supplement (PMC8723353)
Supplement: NIHMS1738698-supplement-Fig_S3.pdf [file NIHMS1738698-supplement-Fig_S3.pdf]

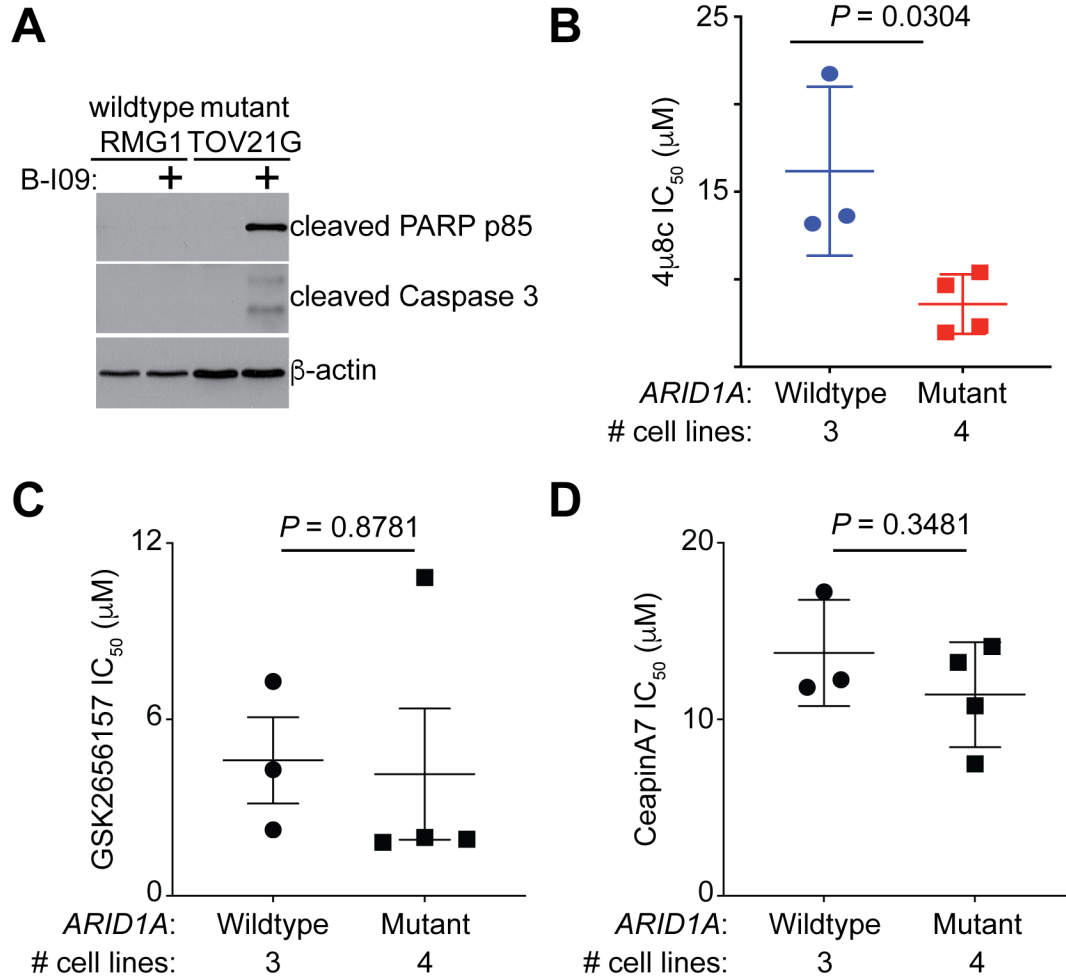

**Supplementary Figure 3: Correlation between ARID1A mutational status and response to IRE1 $\alpha$  inhibition.** (A) ARID1A-mutated TOV21G cells and ARID1A knockout RMG1 cells were treated with vehicle control or 20  $\mu$ M B-I09 for 24 hours. Expression of the indicated markers of apoptosis and a loading control  $\beta$ -actin was examined by immunoblot. (B-D) Comparison of IC<sub>50</sub>s of IRE1 $\alpha$  inhibitor 4 $\mu$ 8c (B), PERK inhibitor GSK2656157 (C) and ATF6 inhibitor CeapinA7 (D) in ARID1A wildtype (RMG1, OVCA429 and KK) and mutant (TOV21G, OVTOKO, OVISE and SKOV3) cell lines. *P* values were calculated using two-tailed Student's *t*-test. Error bars represent mean with SD.
