# Supplementary material
Source: PubMed Central journal article supplement (PMC8723353)
Supplement: NIHMS1738698-supplement-Fig_S4.pdf [file NIHMS1738698-supplement-Fig_S4.pdf]

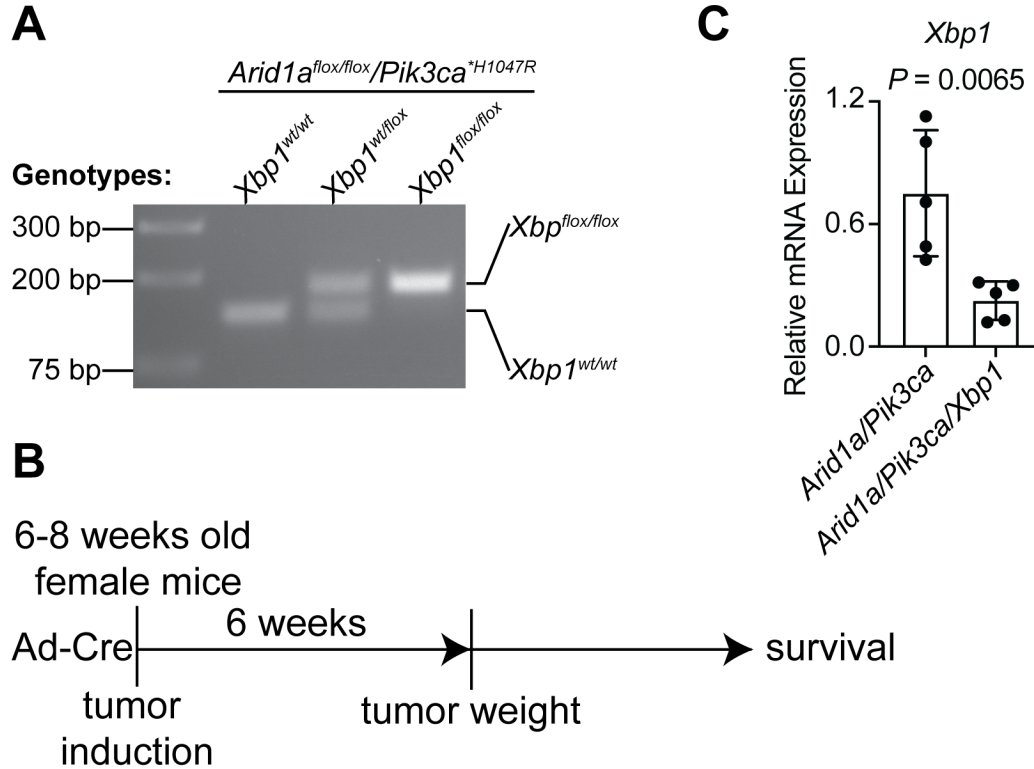

**Supplementary Figure 4: *Xbp1* knockout in *Arid1a<sup>-/-</sup>/Pik3ca<sup>H1047R</sup>* genetic OCCC model. (A)** Examples of genotypes of the indicated mice. **(B)** Schematic of experimental design for comparison between *Arid1a<sup>flox/flox</sup>/Pik3ca<sup>H1047R</sup>* and *Arid1a<sup>flox/flox</sup>/Pik3ca<sup>H1047R</sup>/Xbp1<sup>flox/flox</sup>*. **(C)** Relative expression of *Xbp1* in tumors developed from mice with the indicated genotypes was determined by RT-qPCR analysis (n = 5 mice per group). *P* values were calculated using two-tailed Student's *t*-test. Error bars represent mean with SD.
